# Supplementary material for: Nebulization of siRNA for inhalation therapy based on a microfluidic surface acoustic wave platform
Source: PubMed Central journal article supplement — Ultrason Sonochem. 2022 Jun 30;88:106088. doi: 10.1016/j.ultsonch.2022.106088 (PMC9263997; doi:10.1016/j.ultsonch.2022.106088), 2022-06-30
Supplement: mmc1.pdf [file mmc1.pdf]

## SUPPLEMENTARY MATERIAL

# **Nebulization of siRNA for inhalation therapy based on a microfluidic surface acoustic wave platform**

Christina Cortez-Jugo<sup>a,d,#,\*,†</sup>, Sarah Masoumi<sup>b,#</sup>, Peggy P. Y. Chan<sup>c,d</sup>, James Friend<sup>b,d</sup> and Leslie Yeo<sup>b,\*</sup>

<sup>a</sup> Monash Institute of Pharmaceutical Sciences, Monash University, Parkville, Victoria 3052, Australia

<sup>b</sup> Micro/Nanophysics Research Laboratory, RMIT University, Melbourne, Victoria 3001, Australia

<sup>c</sup> School of Software and Electrical Engineering, Swinburne University, Hawthorn, Victoria 3122, Australia

<sup>d</sup> Melbourne Centre for Nanofabrication, 151 Wellington Road, Clayton, Victoria 3168, Australia

\* Corresponding authors at: Department of Chemical Engineering, The University of Melbourne, Parkville, Victoria 3010, Australia. Email: leslie.yeo@rmit.edu.au, ccortez@unimelb.edu.au

# These authors contributed equally to this work.

†Present Address: Department of Chemical Engineering, The University of Melbourne, Parkville, Victoria 3010, Australia

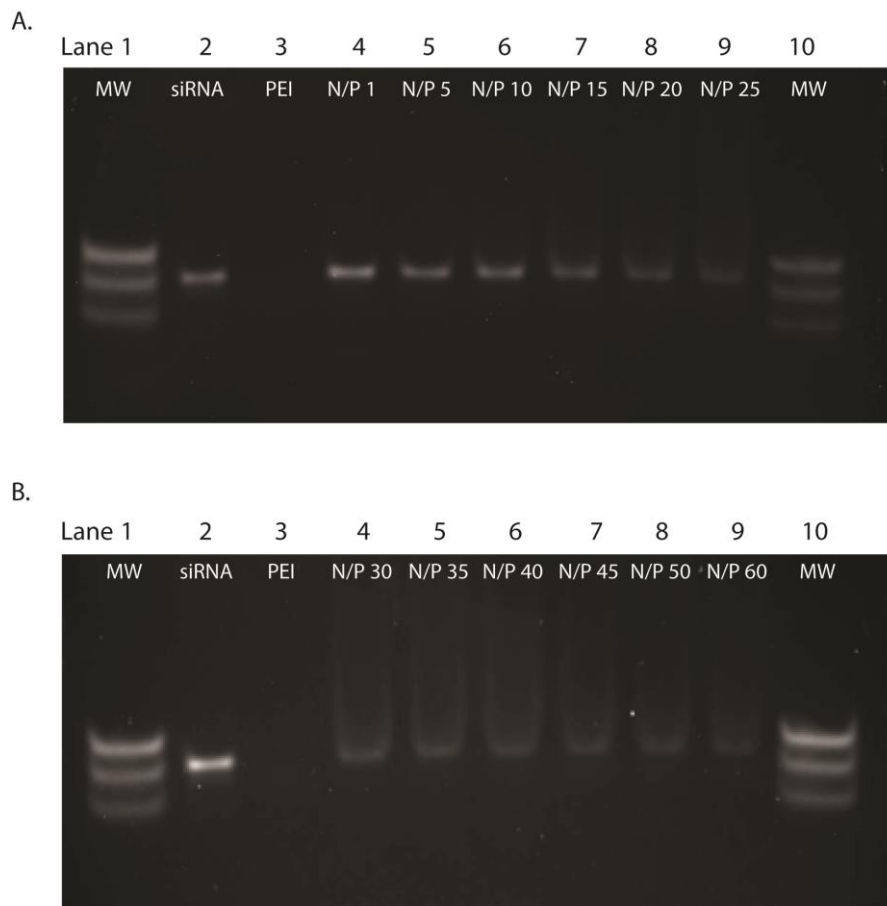

**Figure S1.** Non-denaturing polyacrylamide gel electrophoresis showing the complexation of siRNA with linear PEI at N to P ratios of (A.) 1, 5, 10, 20, 25; and (B.) 30, 35, 40, 45, 50, 60. The bands representing a siRNA molecular weight ladder (17, 21, 25 bp), naked siRNA and PEI alone are also shown in both gels.

Lane 1      2      3      4      5

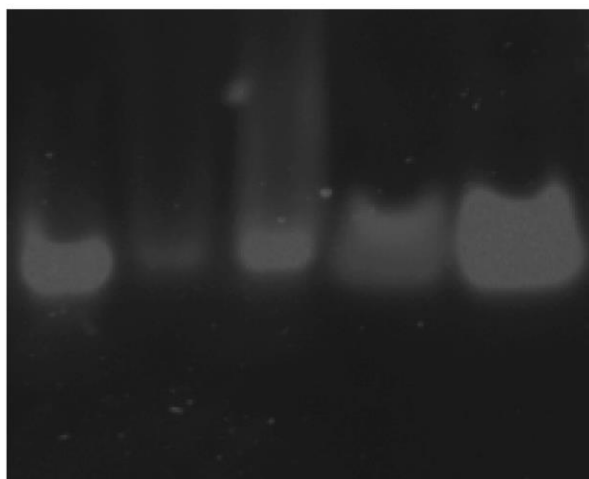

**Figure S2.** Non-denaturing polyacrylamide gel electrophoresis showing the release of siRNA from the complexes by incubation with heparin. Lane 1: Naked siRNA; Lane 2: siRNA/PEI complexes at N/P 30 (in sodium acetate, Ph 5.2); Lane 3: siRNA/PEI complexes at N/P 30 (in water); Lane 4: siRNA/PEI complexes at N/P 30 in the presence of heparin (in sodium acetate, Ph 5.2); and Lane 5: siRNA/PEI complexes at N/P 30 in the presence of heparin (in water).

**Table S1.** Hydrodynamic diameters of INTERFERin/siRNA complexes

| Complex <sup>a</sup> | Diameter <sup>b</sup> (nm) |
|----------------------|----------------------------|
| INTERFERin/siRNA = 1 | 620 +/- 80                 |
| INTERFERin/siRNA = 2 | 545 +/- 220                |
| INTERFERin/siRNA = 3 | 455 +/- 110                |

<sup>a</sup> INTERFERin/siRNA of 1 refers to the suggested ratio as per the manufacturer's protocol. INTERFERin/siRNA of 2 and 3 refer to 2x and 3x the recommended volume of INTERFERin, respectively.

<sup>b</sup> Measured using dynamic light scattering, in 25mM sodium acetate, pH 5.2

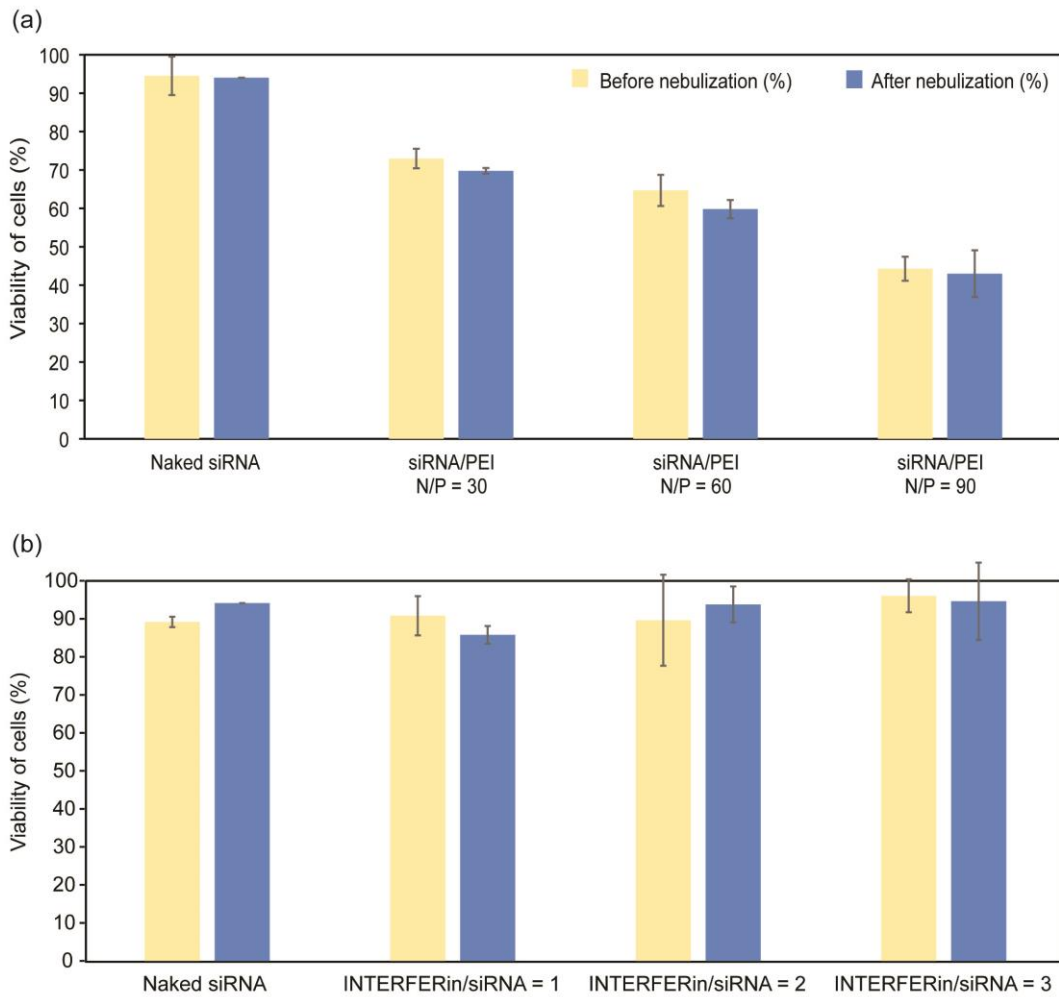

**Figure S3.** Viability of cells treated with naked siRNA and siRNA complexed with cationic PEI (a) or INTERFERin (b) at various ratios. Cells were incubated with nebulized or non-nebulized siRNA samples and incubated for 48 h at 37°C with 5% CO<sub>2</sub> prior to measurement of cell viability using the Alamar blue reagent. The viability of treated samples has been normalized against the viability of untreated cells.
